# Supplementary material
Source: publisher figshare collection journal article supplement (https://acs.figshare.com/ndownloader/files/4020301)
Supplement: Supplementary file 1 [file 4020301]

## Sheet: Sheet1
	Spot No.	Full Protein Name	Protein symbol	UniProt Accession no.	T-test	Fold regulation	No. Of peptides sequenced	Observed	Mrexpt	Mrcalc	ppm	Miss	Score	Expect	Rank	Peptide	Location in MS computer	Interesting properties	% Sequence Coverage	No of Unique peptides	Total Score
1. Metabolism
Up-regulated
	958	Aldehyde dehydrogenase, mitochondrial	ALDH2	P05091	0.04	1.38	2	1132.65	1131.64	1131.58	48.8	0	36	0.0059	1	RAAFQLGSPWRR	Spot Set: BioMacs\juni2010, Label: N22, Spot Id: 545215, Peak List Id: 724921, MS Job Run Id: 32593		5.6	2	66
								1599.86	1598.86	1598.78	46.4	0	30	0.023	1	RELGEYGLQAYTEVKT
	1563	Pyruvate dehydrogenase E1 component subunit beta, mitochondrial	ODBP	P11177	0.01	1.99	4	1747.92	1746.91	1746.88	21.1	0	73	1.3e-06	1	RIMEGPAFNFLDAPAVRV	Spot Set: BioMacs\juni2010, Label: O17, Spot Id: 545234, Peak List Id: 724940, MS Job Run Id: 32593		21.8845	4	207
								1801.93	1800.92	1800.89	14.6	0	61	2.4e-05	1	KVFLLGEEVAQYDGAYKV
								1827.98	1826.97	1826.94	17.7	0	44	0.00097	1	KTYYMSGGLQPVPIVFRG
								1891.88	1890.88	1890.83	26.1	1	29	0.028	1	RDAINQGMDEELERDEKV
2. Protein synthesis, folding, modification and secretion
Up-regulated
	1501	Eukaryotic translation initiation factor 3 subunit I	EIF3I	Q13347	0.04	1.75	3	1086.56	1085.55	1085.58	-28.35	0	72	2.4e-06	1	RQINDIQLSRD	Spot Set: BioMacs\dec_jan_2012, Label: D6, Spot Id: 551362, Peak List Id: 771007, MS Job Run Id: 34453		11.6923	3	185
								1276.51	1275.5	1275.54	-28.96	0	63	1.5e-06	1	KSYSSGGEDGYVRI
								1318.61	1317.61	1317.66	-37.76	0	50	0.00025	1	KLFDSTTLEHQKT
Down-regulated
	501	Stress-70 protein, mitochondrial	GRP75	P38646	0.02	-1.5	4	1290.66	1289.65	1289.67	-15.2	0	47	0.00062	1	KVQQTVQDLFGRA	SpotSet:BioMacs\juni2010,Label:P3,SpotId:545244,PeakListId:724950,MSJobRunId:32593		9.63665	4	198
								1361.72	1360.71	1360.74	-15.09	0	53	0.00019	1	RAQFEGIVTDLIRR
								1592.92	1591.92	1591.94	-17.51	0	43	0.00047	1	KLLGQFTLIGIPPAPRG
								1694.82	1693.82	1693.84	-15.97	0	55	8.3e-05	1	KNAVITVPAYFNDSQRQ
3. Signal transduction
Down-regulated
	1704	Annexin A3	ANXA3	P12429	0.03	-2.08	4	943.43	942.42	942.44	-25.26	0	50	0.00014	1	KLTFDEYRN	SpotSet:BioMacs\juni2010,Label:M5,SpotId:545174,PeakListId:724880,MSJobRunId:32593		15.7895	4	276
								1018.5	1017.5	1017.52	-26.34	0	55	0.00012	1	RNTPAFLAERL
								1222.57	1221.57	1221.6	-26.31	0	64	1.1e-05	1	KGIGTDEFTLNRI
								1673.82	1672.81	1672.86	-30.63	0	107	5.9e-10	1	KGAGTNEDALIEILTTRT
4. Cytoskeleton, vesicle motility/intracellular transport/vesicle release
Up-regulated
	1063	Actin-related protein 3	ARP3	P61158	0.05	1.73	4	1214.53	1213.53	1213.56	-29.9	0	43	0.00066	1	KEFSIDVGYERF	Spot Set: BioMacs\dec_jan_2012, Label: J5, Spot Id: 551505, Peak List Id: 773775, MS Job Run Id: 34553		14.1148	4	149
								1338.56	1337.55	1337.59	-29.77	0	28	0.014	1	KDYEEIGPSICRH
								1540.7	1539.69	1539.71	-11.47	0	37	0.0044	1	RLPACVVDCGTGYTKL
								1768.84	1767.83	1767.9	-38.32	1	41	0.0021	1	RDREVGIPPEQSLETAKA
	1373	Actin, cytoplasmic 1	ACTB	P60709	0.02	2.69	3	976.43	975.42	975.44	-23.57	0	31	0.013	1	KAGFAGDDAPRA	Spot Set: BioMacs\dec_jan_2012, Label: D3, Spot Id: 551359, Peak List Id: 771004, MS Job Run Id: 34453		11.7333	3	192
								1354.59	1353.59	1353.62	-22.85	1	65	4.5e-06	1	KDSYVGDEAQSKRG
								1790.83	1789.82	1789.88	-33.36	0	96	5.1e-09	1	KSYELPDGQVITIGNERF
	1557	F-actin-capping protein subunit alpha-1	CAZA1	P52907	0.05	1.61	6	937.38	936.37	936.4	-28.03	0	64	2.5e-06	1	RESCDSALRA	Spot Set: BioMacs\dec_jan_2012, Label: D7, Spot Id: 551363, Peak List Id: 771008, MS Job Run Id: 34453		35.6643	6	484
								1197.66	1196.65	1196.69	-29.05	0	68	3.5e-06	1	RLLLNNDNLLRE
								1542.64	1541.63	1541.68	-34.05	0	83	3.5e-08	1	KEASDPQPEEADGGLKS
								1570.86	1569.86	1569.91	-35.56	0	35	0.0076	1	KFTITPPTAQVVGVLKI
								1705.76	1704.75	1704.82	-36.25	0	127	3.1e-12	1	KDVQDSLTVSNEAQTAKE
								3040.23	3039.22	3039.37	-46.74	0	107	5.3e-11	1	KIIENAENEYQTAISENYQTMSDTTFKA
	1563	F-actin-capping protein subunit alpha-1	CAZA1	P52907	0.01	1.99	5	1197.71	1196.7	1196.69	10.2	0	77	2.5e-07	1	RLLLNNDNLLRE			32.5175	5	294
								1570.94	1569.93	1569.91	11.9	0	32	0.0049	1	KFTITPPTAQVVGVLKI	Spot Set: BioMacs\juni2010, Label: O17, Spot Id: 545234, Peak List Id: 724940, MS Job Run Id: 32593
								2089.06	2088.06	2088.01	23.6	0	49	0.00031	1	KFITHAPPGEFNEVFNDVRL
								2245.11	2244.11	2244.07	18.7	0	68	3e-06	1	KIEGYEDQVLITEHGDLGNSRF
								2314.2	2313.19	2313.14	21.8	0	68	3.2e-06	1	KTIDGQQTIIACIESHQFQPKN
Down-regulated
	1704	Annexin A4	ANXA4	P09525	0.03	-2.08	5	995.5	994.49	994.53	-33.6	0	42	0.0019	1	KFLTVLCSRN	SpotSet:BioMacs\juni2010,Label:M5,SpotId:545174,PeakListId:724880,MSJobRunId:32593		23.8245	5	326
								1371.63	1370.62	1370.66	-26.52	0	47	0.00036	1	RISQTYQQQYGRS
								1597.67	1596.66	1596.72	-35.06	0	32	0.0048	1	KAASGFNAMEDAQTLRK + Oxidation (M)
								1661.77	1660.76	1660.81	-28.96	0	96	5.9e-09	1	KGAGTDEGCLIEILASRT
								1692.82	1691.82	1691.87	-33.56	0	109	3.3e-10	1	KGLGTDEDAIISVLAYRN
5. RNA synthesis/turnover
Up-regulated
	958	Heterogeneous nuclear ribonucleoprotein H	HNRH1	P31943	0.04	1.38	2	1092.63	1091.62	1091.57	45.4	0	71	1.5e-06	1	RVHIEIGPDGRV	Spot Set: BioMacs\juni2010, Label: N22, Spot Id: 545215, Peak List Id: 724921, MS Job Run Id: 32593		6.90423	2	100
								1841.98	1840.97	1840.88	47.6	0	29	0.025	1	RSTGEAFVQFASQEIAEKA
6. Defense and repair
Down-regulated
	2377	Lithostathine-1-alpha // Islet of Langerhans regenerating protein	REG1A	P05451	0.01	-1.85	7	1267.59	1266.58	1266.57	9.04	0	82	1.6e-07	1	RISCPEGTNAYRS	SpotSet:BioMacs\juni2010,Label:M15,SpotId:545184,PeakListId:724890,MSJobRunId:32593		70.8333	6	496
								1416.57	1415.56	1415.55	10.1	0	42	0.00031	1	RSYCYYFNEDRE
								1436.7	1435.7	1435.69	6.18	0	92	1.9e-08	1	RWHWSSGSLVSYKS
								1630.74	1629.73	1629.72	8.46	1	39	0.002	1	KDVPCEDKFSFVCKF
								1929.92	1928.91	1928.89	9.26	0	31	0.018	1	KESGTDDFNVWIGLHDPKK
								2058.02	2057.01	2056.99	11.6	1	87	4.6e-08	1	KESGTDDFNVWIGLHDPKKN
								2687.33	2686.33	2686.27	21	0	123	9.8e-12	1	KSWGIGAPSSVNPGYCVSLTSSTGFQKW
	2463	Ubiquitin-conjugating enzyme E2 N	UBE2N	P61088	0.02	-1.51	2	1203.57	1202.56	1202.59	-23.18	0	83	1.4e-07	1	KTNEAQAIETARA	Spot Set: BioMacs\dec_jan_2012, Label: D14, Spot Id: 551370, Peak List Id: 771015, MS Job Run Id: 34453		22.3684	2	209
								2005.99	2004.98	2005.05	-31.79	1	126	5.4e-12	1	RLLAEPVPGIKAEPDESNARY
7. Miscellaneous
Down-regulated
	625	Guanylate-binding protein 5	GBP5	Q96PP8	0.05	-1.35	5	987.5	986.49	986.53	-40.19	0	38	0.0046	1	RVQNFNLPRL	Spot Set: BioMacs\dec_jan_2012, Label: J2, Spot Id: 551502, Peak List Id: 773772, MS Job Run Id: 34553		12.628	5	185
								1242.66	1241.65	1241.7	-37.29	1	40	0.003	1	RKGIQAEEVLQKY
								1281.64	1280.64	1280.68	-37.13	0	45	0.001	1	RSLLSELQHAQRT
								1405.6	1404.59	1404.65	-38.06	0	28	0.016	1	KAIAHYDQQMGQKV + Oxidation (M)
								2628.05	2627.04	2627.17	-49.7	0	34	0.00099	1	KMQEQQMQEQAAQLSTTFQAQNRS + 2 Oxidation (M)
